# Supplementary material for: Clinical predictors and electrodiagnostic characteristics in patients with Guillain-Barré syndrome with respiratory failure: a retrospective, matched case-control study
Source: PeerJ. 2022 Feb 10;10:e12930. doi: 10.7717/peerj.12930 (PMC8841033; doi:10.7717/peerj.12930)
Supplement: Supplemental Information 1 [file peerj-10-12930-s001.xlsx]

## Sheet: Data
ID	Female	AGE	DOA	DOnset	DBA	AMPRPU	AMPRDU	AMPLPU	AMPLDU	AMPRPL	AMPRDL	AMPLPL	AMPLDL	AScale	Facial	Bulbar	Tx	Ventilator	DateV	DBV	cause	VMPRPU	VMPRDU	VMPLPU	VMPLDU	VMPRPL	VMPRPDL	VMPRLPL	VMPRLDL	OffV	NotOV	DateOV	DV	DateD	LOS	DCType	DMPRPU	DMPRDU	DMPLPU	DMPLDU	DMPRPL	DMPRDL	DMPLPL	DMPLDL	Dscale	DateEDx	DE	LMM	LMMDML
N1	0	50	2017-02-16	2017-02-02	14	3	3	2	2	2	2	2	2	4	1	0	1	0																2017-02-23	7	1	3	3	3	3	3	3	3	3	4	2017-02-20	18	9
N2	1	46	2014-10-01	2014-09-27	4	3	4	3	4	3	4	3	4	4	0	0	1	0																2014-10-07	6	3	4	5	4	5	4	5	4	5	3	2014-10-03	6	1	3.6
N3	0	66	2018-02-09	2018-01-26	14	5	5	5	5	5	5	5	5	2	0	0	1	0																2018-02-15	6	1	5	5	5	5	5	5	5	5	2	2018-02-13	18	1	3.85
N4	0	45	2015-03-31	2015-03-17	14	0	0	0	0	1	1	3	3	4	2	0	1	0																2015-04-07	7	3	0	0	0	0	2	2	2	2	4	2015-04-01	15	1	4.15
N5	0	46	2016-02-26	2016-02-20	6	3	3	3	3	2	2	2	2	4	2	1	1	0																2016-03-04	7	3	4	4	4	4	2	5	2	5	4	2016-02-26	6	3	9.05
N6	0	41	2016-03-16	2016-03-09	7	4	3	4	3	4	1	4	1	4	0	1	1	0																2016-03-22	6	1	4	4	4	4	4	3	4	3	3	2016-03-17	8	0
N7	1	49	2013-11-28	2013-11-21	7	5	5	5	5	4	4	4	4	2	2	1	1	0																2013-12-04	6	1	4	4	4	4	4	5	4	5	2	2013-11-29	8	1	8.44
N8	1	29	2016-08-19	2016-08-09	10	4	3	5	3	4	3	4	3	4	0	0	1	0																2016-08-25	6	1	5	5	5	5	5	5	5	5	2	2016-08-19	10	9
N9	0	37	2013-02-07	2013-01-31	7	4	3	4	3	4	3	4	3	3	1	0	1	0																2013-02-16	9	1	4	4	4	4	4	2	4	2	3	2013-02-07	7	2	11.4
N10	1	78	2016-02-20	2016-02-15	5	3	4	3	4	3	4	3	4	4	0	1	1	0																2016-02-27	7	1	3	4	3	4	3	5	3	5	3	2016-02-23	8	9
N11	0	25	2016-08-26	2016-08-06	20	5	5	5	5	4	3	4	2	2	0	0	3	0																2016-08-31	5	1	5	5	5	5	4	4	4	4	2	2016-08-29	23	9
N12	0	21	2013-10-07	2013-10-04	3	4	5	3	5	3	5	2	5	3	0	0	3	0																2013-10-08	1	3	4	4	4	4	3	3	4	4	3	2013-10-08	4	1	2.94
N13	1	52	2017-07-17	2017-07-11	6	3	3	3	3	3	3	3	3	4	0	1	1	0																2017-08-05	19	1	3	4	3	4	4	4	4	4	3	2017-07-21	10	9
N14	0	64	2013-11-28	2013-11-25	3	4	4	4	4	4	3	4	3	4	0	1	1	0																2013-12-01	3	3	4	4	4	4	2	4	2	4	3	2013-11-28	3	9
N15	0	69	2014-11-07	2014-11-03	4	4	5	4	5	3	3	3	3	4	0	0	1	0																2014-11-18	11	1	5	5	5	5	4	4	4	4	2	2014-11-12	9	1	3.31
N16	0	66	2019-09-27	2019-09-20	7	5	5	5	5	3	3	3	3	3	0	0	1	0																2019-10-06	9	1	5	5	5	5	4	4	4	4	2	2019-10-01	11	9
N17	0	57	2016-07-11	2016-06-20	21	4	5	4	5	3	4	2	4	3	0	0	1	0																2016-07-16	5	1	5	5	5	5	4	5	4	5	2	2016-07-12	22	9
N18	1	65	2013-02-07	2013-01-31	7	3	3	3	3	4	3	3	3	3	0	0	1	0																2013-02-16	9	1	4	4	4	4	4	4	4	4	3	2013-02-08	8	1	9.48
N19	0	43	2015-09-20	2015-09-17	3	4	5	4	5	3	4	3	4	4	0	0	1	0																2015-09-26	6	1	4	4	4	4	4	4	4	4	3	2015-09-21	4	9
N20	0	52	2018-09-11	2018-09-01	10	3	5	3	5	2	5	2	5	4	0	0	3	0																2018-09-15	4	1	3	3	3	3	2	2	2	2	4	2018-09-12	11	0
N21	0	42	2013-01-05	2013-01-01	4	3	4	3	4	2	3	2	3	4	0	0	1	0																2013-01-14	9	1	3	4	3	4	3	5	3	4	3	2013-01-07	6	0
N22	1	22	2013-12-11	2013-12-08	3	4	5	4	5	4	5	4	5	3	1	1	1	0																2013-12-17	6	1	5	5	5	5	5	5	5	5	2	2013-12-12	4	1	3.02
N23	0	55	2017-10-16	2017-10-10	6	3	3	3	3	3	3	3	3	4	0	0	3	0																2017-10-20	4	1	5	4	5	4	4	2	4	2	3	2017-10-18	8	9
N24	1	53	2015-04-29	2015-04-15	14	4	4	4	4	4	4	4	4	4	0	1	1	0																2015-05-20	21	1	5	5	5	5	4	5	4	5	2	2015-05-06	21	3	5.81
N25	0	46	2013-03-15	2013-03-11	4	4	5	4	5	4	5	4	5	3	0	1	1	0																2013-04-15	31	1	5	5	5	5	5	4	5	5	2	2013-03-15	4	1	3.85
N26	0	47	2013-01-01	2012-12-29	3	5	4	5	4	4	4	4	4	2	2	0	3	0																2013-01-04	3	1	5	5	5	5	5	4	5	4	2	2013-01-03	5	9
N27	0	79	2014-10-14	2014-10-11	3	4	2	3	2	3	2	4	3	4	0	0	3	0																2014-10-21	7	3	4	3	4	2	4	3	4	3	4	2014-10-16	5	2	3.19
N28	0	60	2019-02-15	2019-02-01	14	3	3	3	3	3	3	3	3	4	0	0	1	0																2019-02-22	7	3	4	4	4	4	4	4	4	4	4	2019-02-20	19	2	6.38
N29	0	61	2019-06-20	2019-06-13	7	3	3	3	3	3	3	3	3	4	0	0	1	0																2019-07-05	15	1	5	5	5	5	4	4	4	4	3	2019-06-25	12	9
V1	0	54	2013-01-24	2013-01-21	3	4	4	4	4	1	1	2	2	4	2	1	2	1	2013-01-28	7	3									1		2013-02-07	10	2013-02-27	34	1	5	5	5	5	2	2	2	2	4	2013-01-26	3	9
V2	1	45	2013-01-10	2013-01-09	1	2	2	2	2	0	2	0	2	5	1	1	1	1	2013-01-10	1	1	2	2	2	2	0	2	0	2	0	1		>142	2013-06-01	142	3	5	5	5	5	5	4	3	4	5	2013-01-11	2	9
V3	0	66	2013-01-15	2013-01-08	7	0	0	0	0	0	1	0	1	5	2	1	1	1	2013-01-15	7	2	0	0	0	0	0	1	0	1	0	1		>8	2013-01-23	8	3	0	0	0	0	0	0	0	0	5	2013-01-16	8	9
V4	0	45	2013-07-19	2013-07-17	2	4	3	4	3	2	3	2	3	4	1	0	1	1	2013-07-22	5	2	3	3	3	3	1	1	1	1	1		2013-07-29	7	2013-07-30	11	3	5	5	5	5	3	2	3	2	4	2013-07-29	12	9
V5	0	44	2014-03-13	2014-03-12	1	2	2	2	2	0	0	0	0	5	2	1	1	1	2014-03-13	1	2	2	2	2	2	0	0	0	0	0	2		8	2014-03-21	8	4									6	2014-03-14	2	9
V6	0	39	2014-11-25	2014-11-16	9	4	0	4	0	3	0	3	0	5	0	0	2	1	2014-11-25	9	2	4	0	4	0	3	0	3	0	0	1		>4	2014-11-29	4	3	4	0	4	0	3	0	3	0	5	2014-11-26	10	0
V7	1	50	2015-07-02	2015-06-27	5	2	4	2	4	2	4	2	4	4	0	0	1	1	2015-07-02	5	2	2	4	2	4	2	4	2	4	0	2		4	2015-07-06	4	4									6	2015-07-02	5	0
V8	1	27	2015-07-22	2015-07-20	2	4	5	4	5	1	4	1	4	4	0	1	1	1	2015-07-22	2	2	4	5	4	5	1	4	1	4	1		2015-08-21	30	2015-08-26	34	1	5	5	5	5	2	5	2	5	4	2015-07-22	2	9
V9	0	38	2015-08-06	2015-08-02	4	4	4	4	4	2	2	2	2	5	2	1	1	1	2015-08-06	5	2	4	4	4	4	2	2	2	2	1		2015-08-16	10	2015-08-17	11	3	5	5	5	5	3	3	4	4	4	2015-08-07	5	9
V10	1	78	2015-08-21	2015-08-12	9	0	0	0	0	1	1	1	1	5	2	1	2	1	2015-08-21	9	1	0	0	0	0	1	1	1	1	0	3		>47	2015-10-07	48	2	0	0	0	0	0	0	0	0	5	2015-08-21	9	0
V11	0	25	2016-03-31	2016-03-25	6	2	3	2	3	2	2	2	2	5	2	1	1	1	2016-03-31	6	2	2	3	2	3	2	2	2	2	1		2016-04-11	11	2016-04-12	12	3	4	4	4	4	4	4	4	4	4	2016-04-01	7	9
V12	0	22	2016-04-30	2016-04-23	7	2	4	2	4	2	4	2	3	4	0	1	1	1	2016-05-01	8	1	2	3	2	3	2	3	2	3	1		2016-05-13	12	2016-05-14	14	3	5	4	5	4	4	4	4	4	3	2016-05-02	9	9
V13	1	49	2017-10-01	2017-09-30	1	5	5	2	2	5	5	0	0	4	0	0	1	1	2017-10-12	12	2	1	1	1	1	1	1	1	1	0	2		2	2017-10-14	13	4									6	2017-10-04	3	9
V14	0	68	2017-01-28	2017-01-24	4	4	4	4	4	3	3	3	3	3	2	1	1	1	2017-01-30	6	2	2	2	2	2	1	1	1	1	0	2		9	2017-02-08	11	4									6	2017-01-30	6	9
V15	0	72	2017-06-21	2017-06-14	7	5	5	5	5	3	3	3	3	4	0	0	2	1	2017-07-03	19	2	2	2	2	2	0	0	0	0	0	2		28	2017-07-31	40	4									6	2017-06-28	14	1	15.3
V16	0	66	2017-07-21	2017-06-30	21	3	3	2	2	2	2	1	1	4	0	0	1	1	2017-07-21	21	2	3	3	2	2	2	2	1	1	0	1		>6	2017-07-27	6	3	4	4	3	3	4	4	3	3	5	2017-07-21	21	9
V17	0	60	2017-07-25	2017-07-21	4	2	2	2	2	2	2	2	2	4	2	1	1	1	2017-07-25	4	2	2	2	2	2	2	2	2	2	1		2017-08-06	12	2017-08-09	15	3	3	3	3	3	3	3	3	3	4	2017-07-26	5	1	6.75
V18	1	65	2017-07-31	2017-07-27	4	3	3	3	3	2	2	2	2	4	2	1	1	1	2017-08-04	8	2	2	2	2	2	1	1	1	1	0	2		7	2017-08-11	11	4									6	2017-08-03	7	0
V19	0	43	2017-08-21	2017-08-16	5	1	1	1	1	0	0	0	0	5	0	1	1	1	2017-08-21	5	2	1	1	1	1	0	0	0	0	0	1		>6	2017-08-27	6	3	2	2	2	2	1	1	1	1	5	2017-08-22	6	9
V20	0	57	2017-09-28	2017-09-21	7	2	2	2	2	2	2	2	2	5	0	1	1	1	2017-09-28	7	2	2	2	2	2	2	2	2	2	1		2017-10-19	21	2017-10-21	23	3	2	2	2	2	2	2	2	2	4	2017-09-29	8	9
V21	0	41	2017-11-06	2017-11-03	3	3	3	3	3	2	2	2	2	4	2	1	1	1	2017-11-08	5	2	3	3	3	3	2	2	2	2	1		2017-11-19	11	2017-11-23	17	3	4	4	4	4	3	3	3	3	4	2017-11-07	4	1	8.23
V22	1	21	2018-01-26	2018-01-25	1	5	5	5	5	4	4	4	4	4	2	0	1	1	2018-01-30	5	2	3	1	3	1	1	1	1	1	0	2		6	2018-02-05	10	4									6	2018-01-29	3	1	3.56
V23	0	60	2014-03-05	2014-02-26	7	4	4	4	4	0	0	0	0	5	2	1	1	1	2014-03-05	7	2	4	4	4	4	0	0	0	0	0	2		1	2014-03-06	1	4									6	2014-03-06	8	9
V24	1	50	2019-06-17	2019-06-11	6	4	4	4	4	3	4	3	4	4	0	1	1	1	2019-06-23	12	2	3	3	3	3	2	2	2	2	0	3		36	2019-07-29	42	2									5	2019-06-19	8	9
V25	0	55	2018-12-16	2018-12-13	3	2	2	2	2	2	2	2	2	5	2	1	1	1	2018-12-16	3	2	2	2	2	2	2	2	2	2	1		2018-12-20	4	2018-12-22	6	3	3	3	3	3	4	4	4	4	4	2018-12-17	4	0
V26	0	48	2018-12-20	2018-12-16	4	4	1	2	2	1	1	1	1	4	0	1	1	1	2018-12-21	5	2	1	2	1	2	1	1	1	1	0	1		>35	2019-01-25	36	3	4	4	4	4	3	3	3	3	5	2019-01-02	17	9
V27	0	75	2019-03-09	2019-03-02	7	0	0	0	0	0	0	0	0	5	2	1	1	1	2019-03-09	7	2	0	0	0	0	0	0	0	0	0	1		>16	2019-03-25	16	3	0	1	0	1	0	1	0	1	5	2019-03-11	9	1	14
V28	0	60	2019-07-29	2019-07-19	10	4	4	4	4	2	2	2	2	4	1	1	1	1	2019-07-31	12	2	4	4	4	4	2	2	2	2	1		2019-08-19	19	2019-08-20	22	3	4	4	4	4	2	2	2	2	4	2019-07-31	12	0
V29	0	63	2019-12-18	2019-12-08	10	2	3	2	3	3	3	3	3	4	0	1	1	1	2019-12-20	12	5 cardiac arrest	0	0	0	0	0	0	0	0	0	2		1	2019-12-21	3	4									6	2019-12-18	10	9
[truncated: 71 more columns]

## Sheet: Definition
ID	Female	DOB	AGE	DOA	DOnset	DBA	AMPRPU	AMPRDU	AMPLPU	AMPLDU	AMPRPL	AMPRDL	AMPLPL	AMPLDL	AScale	Facial	Bulbar	Tx	Ventilator	DateV	DBV	cause	VMPRPU	VMPRDU	VMPLPU	VMPLDU	VMPRPL	VMPRPDL	VMPRLPL	VMPRLDL	OffV	NotOV	DateOV	DV	DateD	LOS	DCType	DMPRPU	DMPRDU	DMPLPU	DMPLDU	DMPRPL	DMPRDL	DMPLPL	DMPLDL	Dscale	DateEDx	DE	LMM
N =No Ventilator	0 = Male	Date of birth		Date of admission	Dateofonset	Duration of symptoms before admission	A= admit MP= motor power RPU= right proximal upper	A= admit MP= motor power RDU= right distal upper	LPU= left proximal upper	LDU= left distal upper	RPL= right proximal lower	RDL= right distal lower	LPL= left proximal lower	LDL= left distal lower	GBS scale วัน admit	Facial palsy	bulbar involvement	Treatment	Ventilator use	Date of MV use	Duration before MV used	Cause of MV used	V= Ventilator MP= motor power RPU= right proximal upper	RDU= right distal upper	LPU= left proximal upper	LDU= left distal upper	RPL= right proximal lower	RDL= right distal lower	LPL= left proximal lower	LDL= left distal lower	Off MV	Cause that prevented from off MV	Date off MV	Duration on MV	Date discharge	Length of stay	dischargeโดยวิธี	D= Discharge MP= motor power RPU= right proximal upper	RDU= right distal upper	LPU= left proximal upper	LDU= left distal upper	RPL= right proximal lower	RDL= right distal lower	LPL= left proximal lower	LDL= left distal lower	GBS scale วันdischarge	Date of Edx	Furation from symptoms to Edx	LMM=Leftmedian motor
V = Ventilator	1 = Female						Motor power on admission									0=No	0=No	1=IVIg	0=No			1=RS weakness	Motor power the day that patients on MV								0=No	1=refer					1=approval	Motor power at discharge											9= not done
																1 = Unilat weakness	1=Yes	2=IVIg+Plasmaphoresis	1=Yes			2=Pneumonia									1=1	2=death					2=against advice												0 = no response
																2 = Bilat weakness						3=anaphylaxis										3=against advice					3=transfer												1=done
																						4=septic shock															4=dead												2 =Temporal dispersion
																						5=other																											3= conduction block
[truncated: 72 more columns]

## Sheet: Cutpoint NCS
Motor nerve	latency	>150%ULN	MCV	<70%MCV	CMAP	<80%CMAP	>20%CMAP		Fwave	>120%	>150% if CMAP <50%
Median	4.5	6.75	49	34.3	4.1	3.28	4.92		28	33.6	42
Ulnar	3.7	5.55	50	35	7.9	6.32	9.48		29	34.8	43.5
Tibial	6.1	9.15	39	27.3	4.4	3.52	5.28		55	66	82.5
Peroneal	6.5	9.75	38	26.6	1.3	1.04	1.56		54	64.8	81
Sensory nerve		SNAP	50%SNAP
median		13	6.5
ulnar		9	4.5
sural		4	2
