# Supplementary material for: Clinical predictors and electrodiagnostic characteristics in patients with Guillain-Barré syndrome with respiratory failure: a retrospective, matched case-control study
Source: PeerJ journal article supplement (doi:10.7717/peerj.12930), 2022-02-10
Supplement: Supplementary_material.pdf [file Supplementary_material.pdf]

## Supplementary material

### Electrodiagnostic criteria for GBS (Rajabally et al., 2015)

#### 1. Normal (All the following in all nerves tested)

- ▶  $DML \leq 100\%$  ULN
- ▶ F-wave present with latency  $\leq 100\%$  ULN
- ▶  $MCV \geq 100\%$  LLN
- ▶ Distal CMAP  $\geq 100\%$  LLN
- ▶ Proximal CMAP/distal CMAP ratio  $> 0.7$  (excluding the tibial nerve)

#### 2. Acute inflammatory demyelinating polyradiculoneuropathy (AIDP)

- ▶ At least one of the following in at least two nerves:
  - $MCV < 70\%$  LLN
  - $DML > 150\%$  ULN
  - F-response latency  $> 120\%$  ULN, or  $> 150\%$  ULN (if distal CMAP  $< 50\%$  of LLN)
- ▶ OR
  - F-wave absence in two nerves with distal CMAP  $\geq 20\%$  LLN, with an additional

parameter, in one other nerve.

- ▶ OR
  - Proximal CMAP/distal CMAP ratio  $< 0.7$  (excluding the tibial nerve), in two nerves

with an additional parameter, in one other nerve

#### 3. Axonal GBS forms (Uncini and Kuwabara 2018)

##### 3.1 AMAN GBS:

▶ None of the above features of demyelination in any nerve (except one demyelinating feature allowed in one nerve if distal CMAP  $< 10\%$  LLN), and at least one of the following:

- Distal CMAP  $< 80\%$  LLN in two nerves

- F-wave absence in two nerves with distal CMAP $\geq$ 20% LLN, in absence of any demyelinating feature in any nerve
- Proximal CMAP/distal CMAP ratio <0.7, in two nerves (excluding the tibial nerve)
- F-wave absence in one nerve with distal CMAP $\geq$ 20% LLN OR proximal CMAP/distal CMAP ratio <0.7 (excluding the tibial nerve), in one nerve; with IN ADDITION, distal CMAP <80% LLN in one other nerve

### 3.2 AMSAN GBS (Rajabally et al. 2015)

The same of AMAN Criteria in motor nerves **plus** SNAP <50% LLN in at least two nerves.

### 3.3 Inexcitable:

If distal CMAP absent in all nerves (or present in only one nerve with distal CMAP <10% LLN)

### 4. Equivocal

- ▶ Abnormal range findings however not fitting criteria for any other group

(CMAP: compound muscle action potentials; DML: distal motor latency; GBS: Guillain–Barré syndrome; LLN: lower limit of normal; MCV: motor conduction velocity; ULN: upper limit of normal; SNAP: sensory nerve action potential.)

**Abbreviations:** CMAP, compound muscle action potentials; DML, distal motor latency; GBS, Guillain–Barré syndrome; LLN, lower limit of normal; MCV, motor conduction velocity; ULN, upper limit of normal.

### Reference

- Rajabally, Y. A., M. C. Durand, J. Mitchell, D. Orlikowski & G. Nicolas (2015) Electrophysiological diagnosis of Guillain-Barré syndrome subtype: could a single study suffice? *J Neurol Neurosurg Psychiatry*, 86, 115-9.
- Uncini, A. & S. Kuwabara (2018) The electrodiagnosis of Guillain-Barre syndrome subtypes: Where do we stand? *Clinical Neurophysiology*, 129, 2586-2593.
